# Supplementary material for: Eco-Sustainable Silk Fibroin/Pomegranate Peel Extract Film as an Innovative Green Material for Skin Repair
Source: MDPI journal article supplement (doi:10.3390/ijms23126805), 2022-06-18
Supplement: s1 [file s1]

## Supplementary Information

### *Eco sustainable Silk Fibroin/Pomegranate Peel Extract Film as Innovative Green Material for Skin Repair*

Marianna Barbalinardo,<sup>a,1</sup> Marta Giannelli,<sup>b,1</sup> Ludovica Forcini,<sup>b</sup> Barbara Luppi,<sup>c</sup> Anna Donnadio,<sup>d</sup> Maria Luisa Navacchia,<sup>b</sup> Giampiero Ruani,<sup>a</sup> Giovanna Sotgiu,<sup>b</sup> Annalisa Aluigi,<sup>b,e</sup> Roberto Zamboni,<sup>b,\*</sup> Tamara Posati<sup>b,\*</sup>

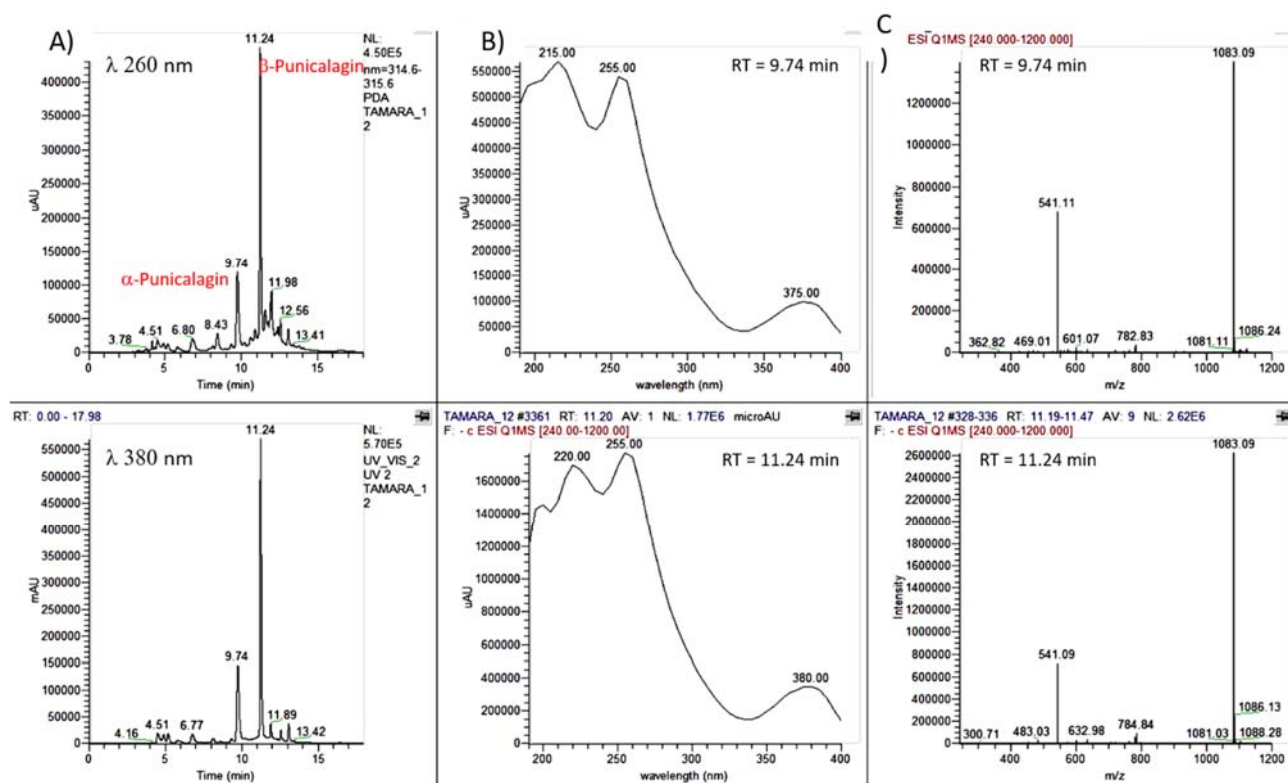

**Figure S1.** A) HPLC chromatogram of EPP at λ 260 (up) and 380 nm (down); B) UV-vis spectrum of peak at RT = 9.74 min (up) and UV-vis spectrum of peak at RT = 11.24 min (down); C) mass spectrum of peak at RT = 9.74 min (up) and mass spectrum of peak at RT = 11.24 min (down).

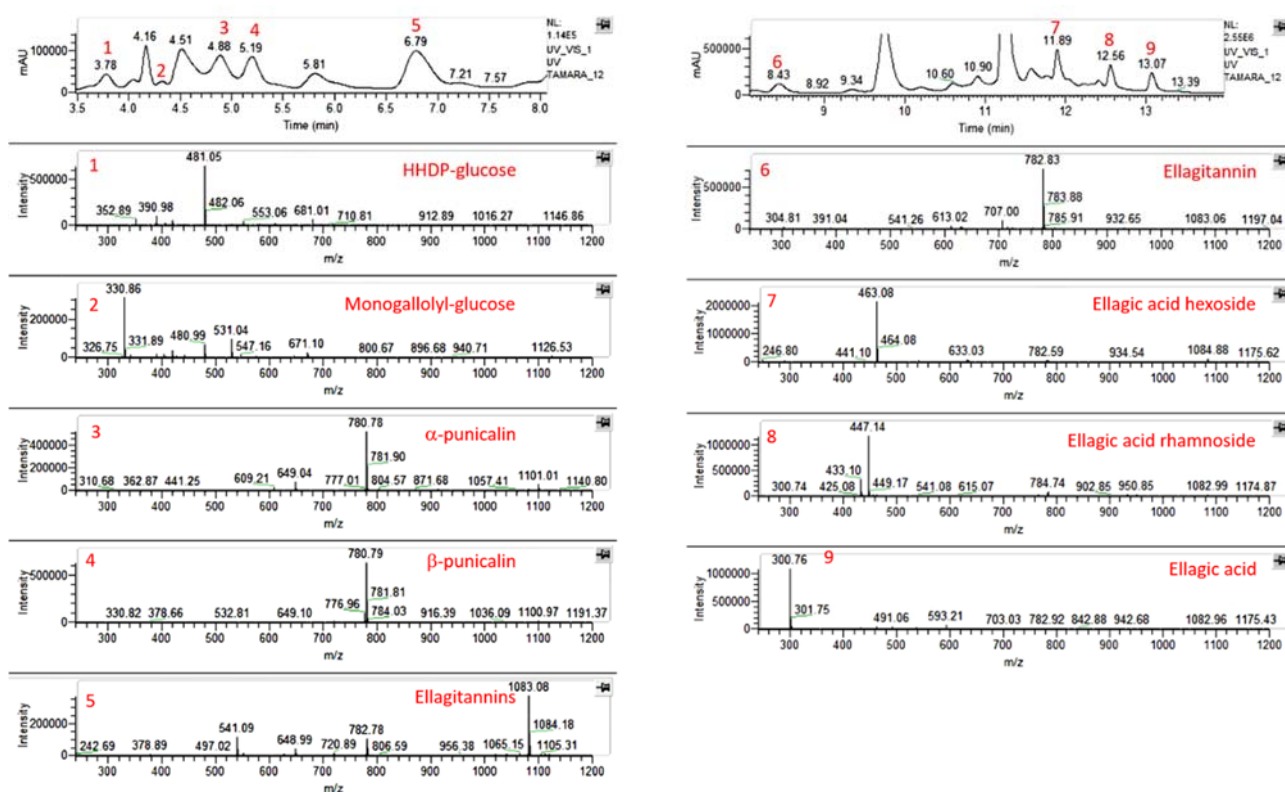

**Figure S2.** HPLC chromatogram at  $\lambda_{260}$  nm and MS spectrum of the minor compounds identified in EPP.

**Table S1.** Retention times RT (min),  $\lambda_{\max}$  UV–Vis absorbance, MS (ES-) of tannins identified in EPP.

|   |                         | RT (min) | $\lambda_{\max}$ UV–Vis (nm) | MS (ES-) m/z |
|---|-------------------------|----------|------------------------------|--------------|
| 1 | HHDP-glucose            | 3.78     | slope                        | 481          |
| 2 | Monogalloyl-glucose     | 4.32     | 275                          | 331          |
| 3 | $\alpha$ -Punicalin     | 4.88     | 781                          | 260-365      |
| 4 | $\beta$ -Punicalin      | 5.19     | 781                          | 260-380      |
| 5 | Ellagitannins m/z 1083  | 6.79     | 1083                         | 255-375      |
| 6 | Ellagitannin m/z 783    | 8.43     | 783                          | slope        |
| 7 | Ellagic acid hexoside   | 11.89    | 463                          | 250-360      |
| 8 | Ellagic acid rhamnoside | 12.56    | 447                          | 250-360      |
| 9 | Ellagic acid            | 13.07    | 301                          | 250-365      |

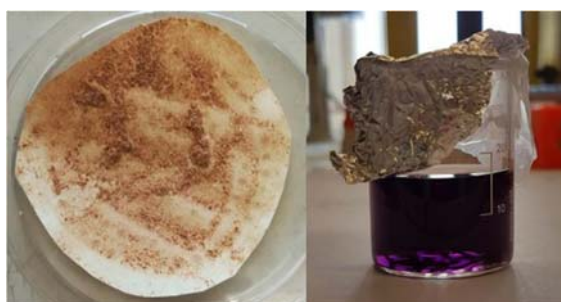

**Figure S3.** Pictures of extraction residue (left) and DPPH test with ~150 mg of residue (right).

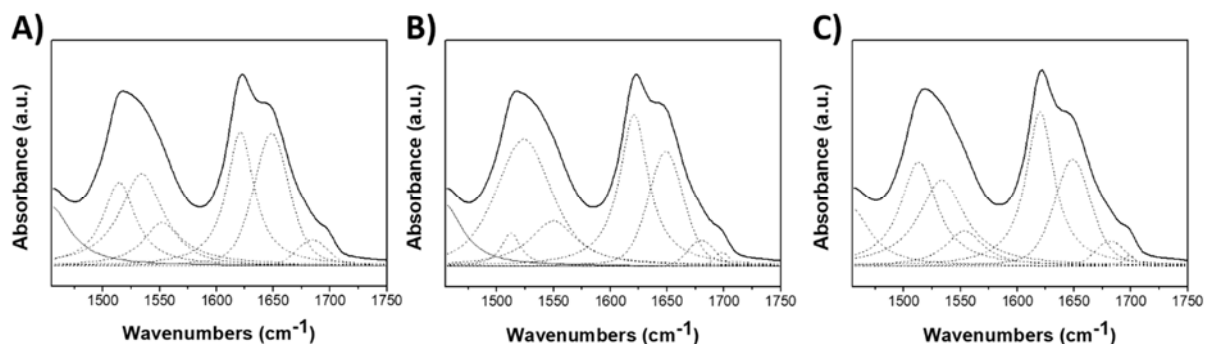

**Figure S4.** Deconvolution of ATR spectra (Amide I and Amide II bands) of SF (A), SF-EPP0.75 (B) and SF-EPP 1.5 (C).

**Table S2.** Quantification of the secondary structure elements.

| Centroid (cm <sup>-1</sup> ) | Area (SF) | Area (SF-EPP0.75) | Area (SF-EPP1.5) | Assignment          |
|------------------------------|-----------|-------------------|------------------|---------------------|
| 1515                         | 11.10     | 20.07             | 15.50            | $\beta$ -structures |
| 1534                         | 16.13     | 2.56              | 10.03            | $\alpha$ -helix     |
| 1550                         | 6.60      | 8.70              | 4.33             | $\alpha$ -helix     |
| 1623                         | 15.03     | 17.90             | 19.71            | $\beta$ -structures |
| 1650                         | 15.01     | 12.52             | 9.01             | $\alpha$ -helix     |
| 1700                         | 2.18      | 2.47              | 2.64             | $\beta$ -structures |

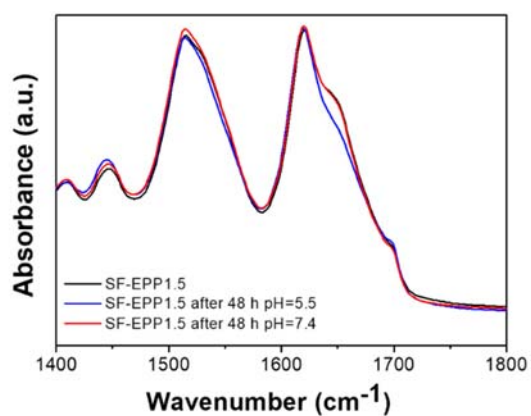

**Figure S5.** ATR spectrum of pristine SF-EPP1.5 film (black line), SF-EPP1.5 film after 48 h a pH 5.5 (blue line) and SF-EPP1.5 film after 48 h a pH 7.4 (red line) recorded in the 1200–1800 cm<sup>-1</sup> region.

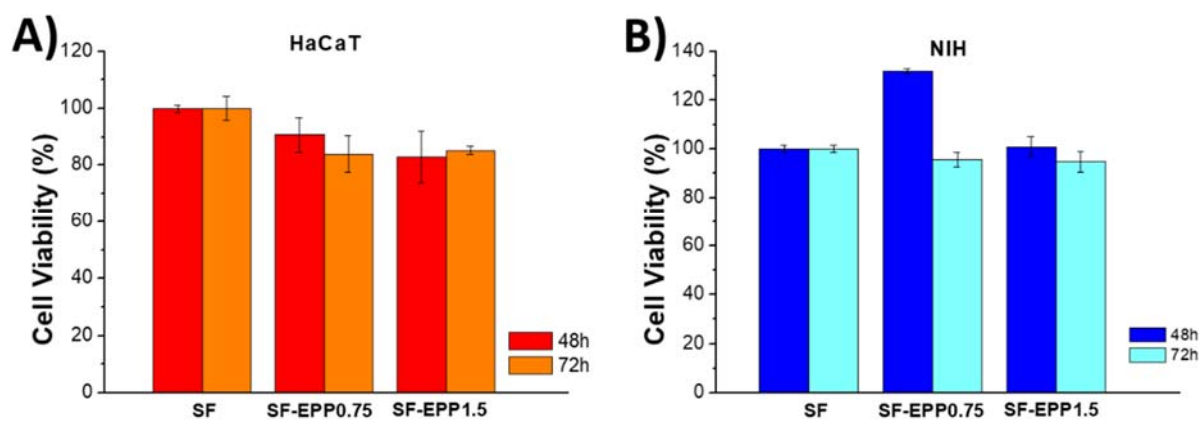

**Figure S6.** Resazurin assay carried out on HaCaT (A) and NIH (B) cells plated on SF and SF-EPP films.

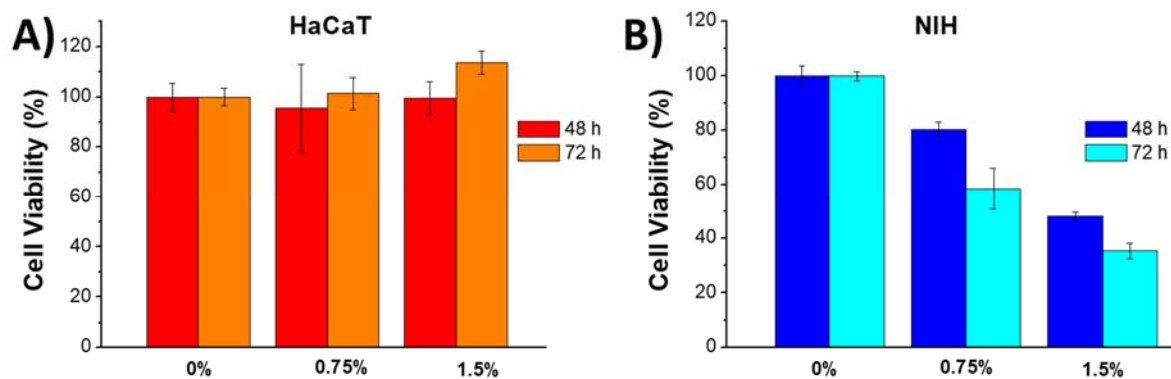

**Figure S7.** Resazurin assay carried out on HaCaT (A) and NIH (B) cells treated with free EPP.

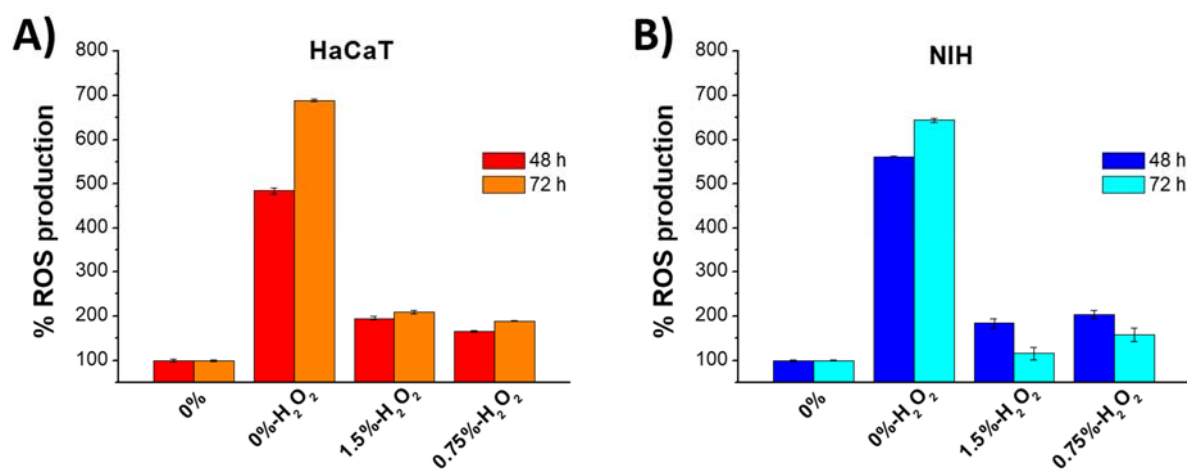

**Figure S8.** ROS production of HaCaT and NIH cells treated with  $H_2O_2$  with and without adding free EPP.

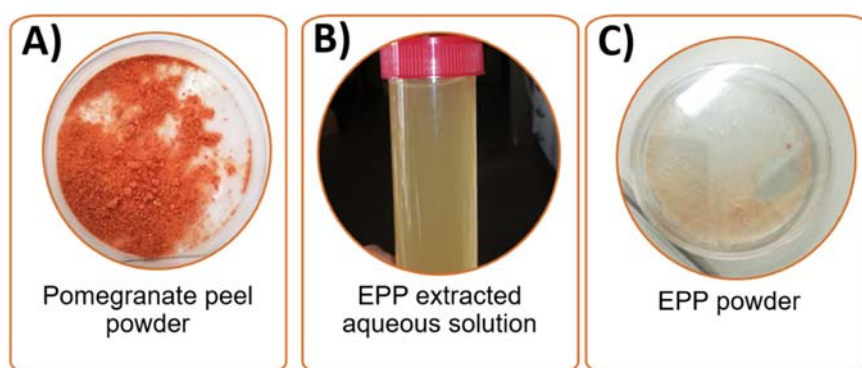

**Figure S9.** Pictures of pomegranate peel powder (A), EPP extracted aqueous solution (B) and EPP powder (C).
